# Supplementary material for: Meta-Analysis of the Effects of Yeast Cell Wall Extract Supple-Mentation during Mycotoxin Challenges on the Performance of Laying Hens
Source: MDPI journal article supplement (doi:10.3390/toxins16040171), 2024-03-30
Supplement: s1 [file s1]

# Meta-analysis of the effects of yeast cell wall extract supplementation during mycotoxin challenges on the performance of laying hens

Alexandra C. Weaver, Daniel M. Weaver, Nicholas Adams and Alexandros Yiannikouris

## SUPPLEMENTARY MATERIAL

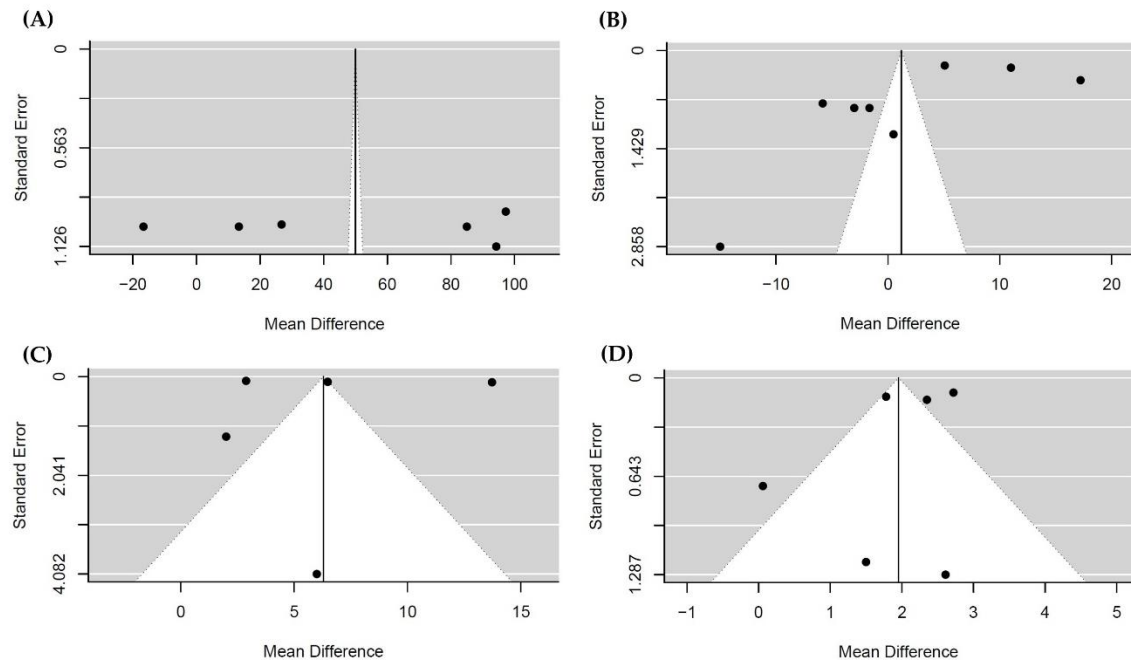

**Supplementary Figure S1.** Funnel plots for assessment of the publication bias of studies included in the random-effects meta-analysis showing the mean differences in (A) body weight (g), (B) feed intake (g/d), (C) percent egg production, and (D) egg weight (g) of laying hens. Circles represent individual study comparisons between treatments of control (CTRL) versus mycotoxins alone (MT).

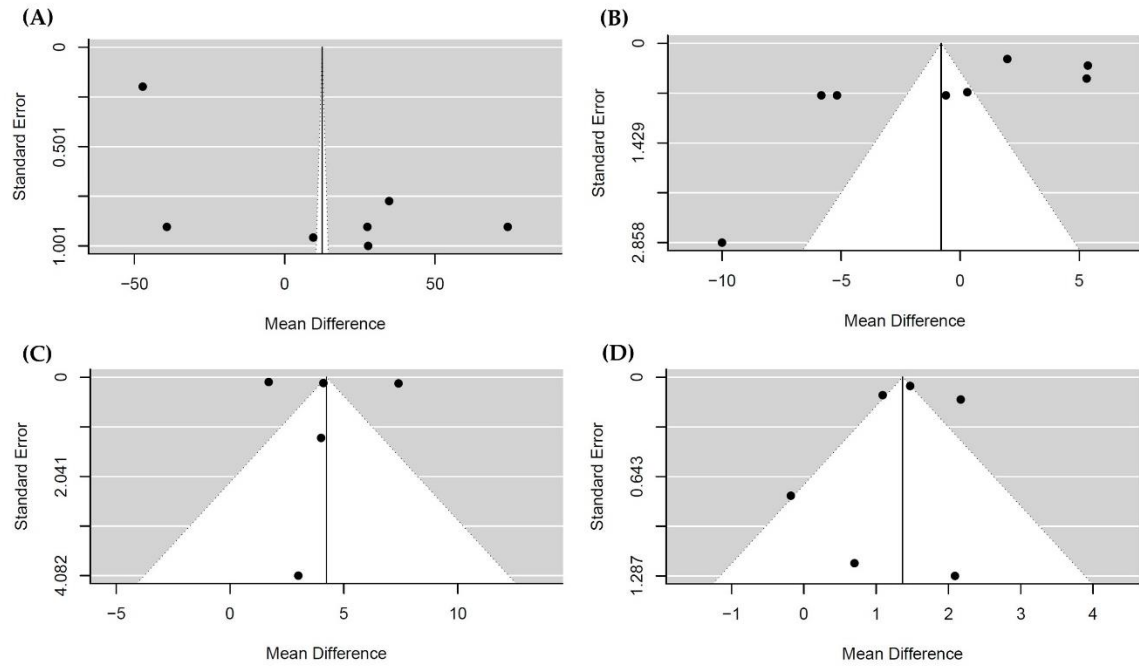

**Supplementary Figure S2.** Funnel plots for assessment of the publication bias of studies included in the random-effects meta-analysis showing the mean differences in (A) body weight (g), (B) feed intake (g/d), (C) percent egg production, and (D) egg weight (g) of laying hens. Circles represent individual study comparisons between treatments of yeast cell wall extract during mycotoxin challenges (YCWE+MT, Mycosorb<sup>®</sup>, Alltech, Inc.) versus mycotoxins alone (MT).

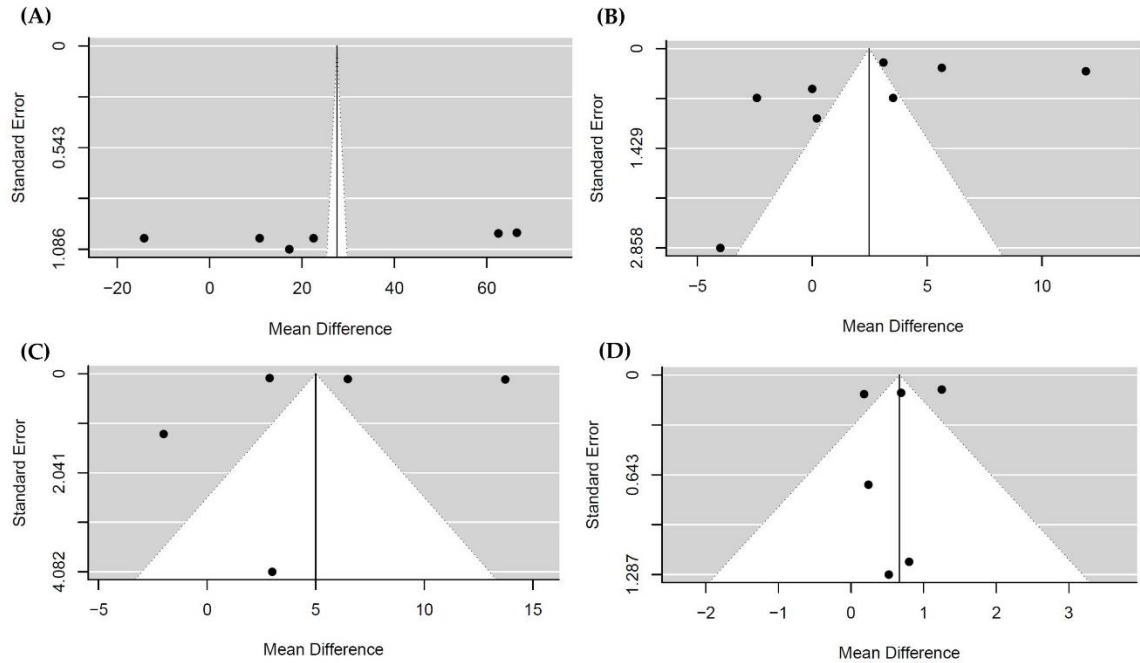

**Supplementary Figure S3.** Funnel plots for assessment of the publication bias of studies included in the random-effects meta-analysis showing the mean differences in (A) body weight (g), (B) feed intake (g/d), (C) percent egg production, and (D) egg weight (g) of laying hens. Circles represent individual study comparisons between treatments of control (CTRL) versus yeast cell wall extract during mycotoxin challenges (YCWE+MT, Mycosorb®, Alltech, Inc.).
